# Supplementary figures and images for: Multiple conformations are a conserved and regulatory feature of the RB1 5′ UTR
Source: PubMed Central journal article supplement — RNA. 2015 Jul;21(7):1274–85. doi: 10.1261/rna.049221.114 (PMC4478346; doi:10.1261/rna.049221.114), 2015-07

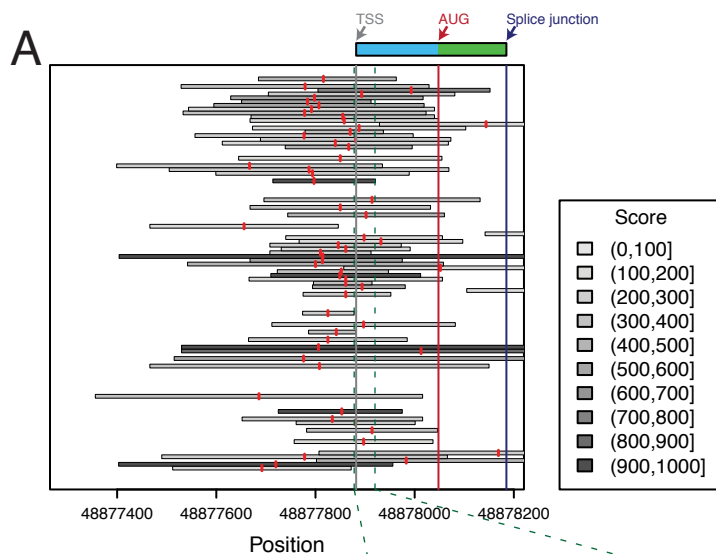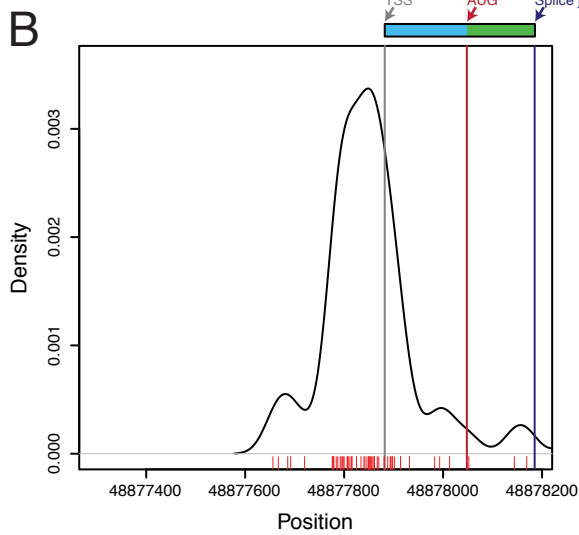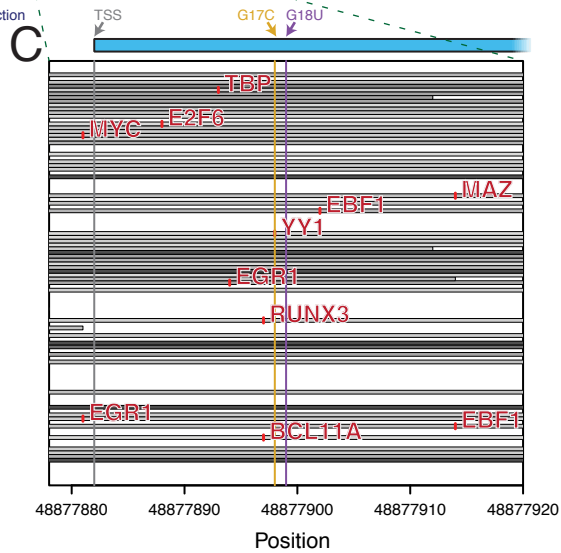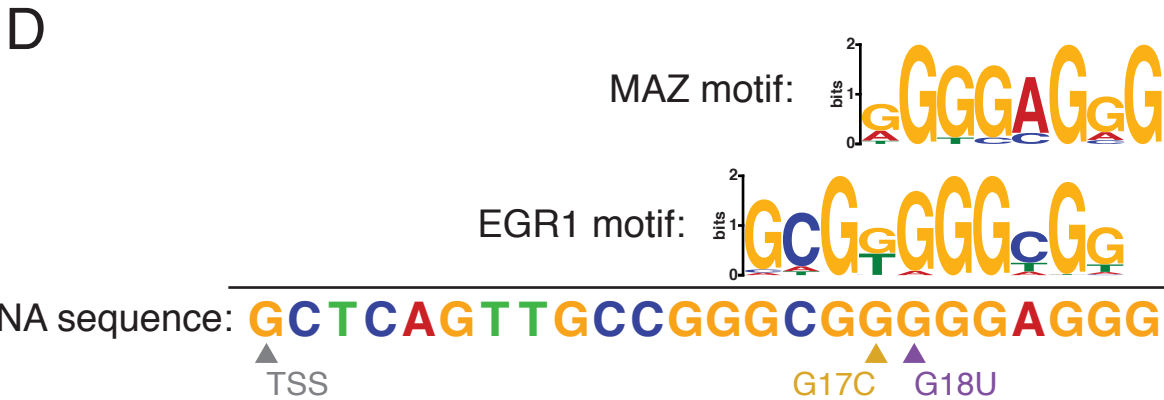

Supplement: supp_049221.114_FigureS2.pdf [file supp_049221.114_FigureS2.pdf]

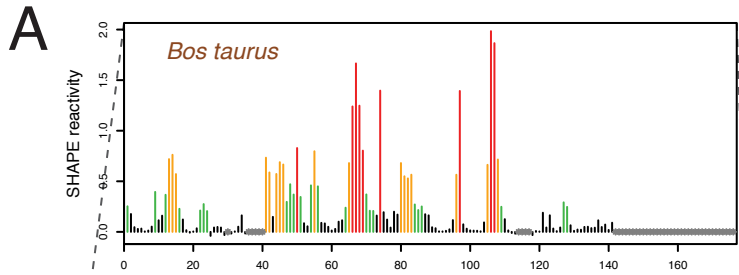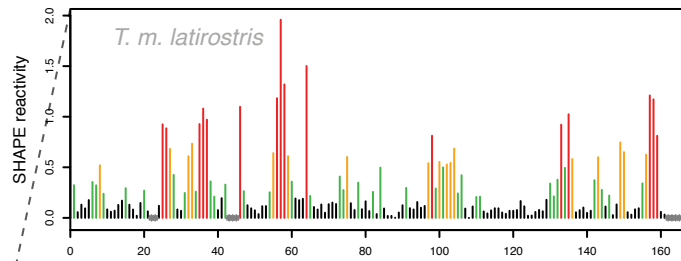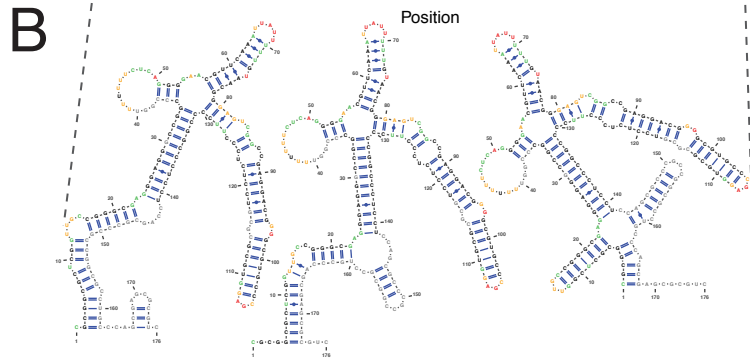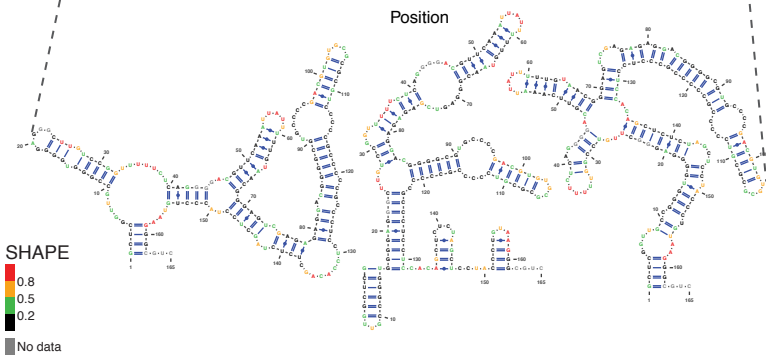

Supplement: supp_049221.114_FigureS4.pdf [file supp_049221.114_FigureS4.pdf]

**A**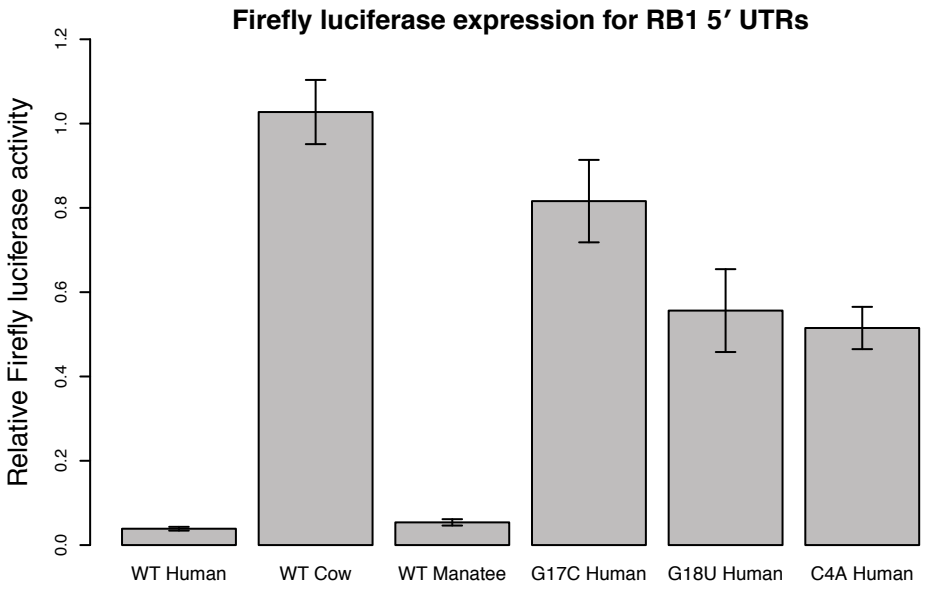**B**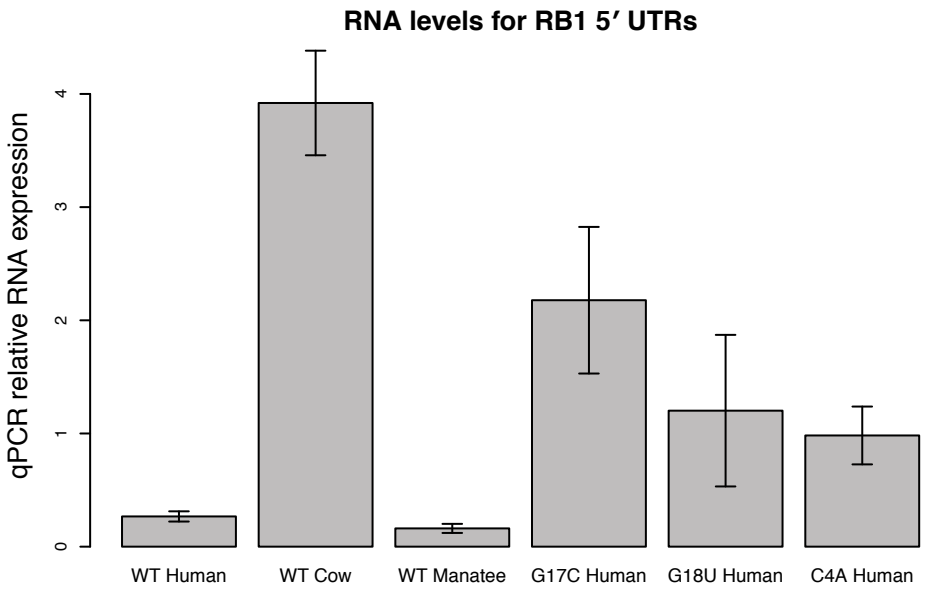**C**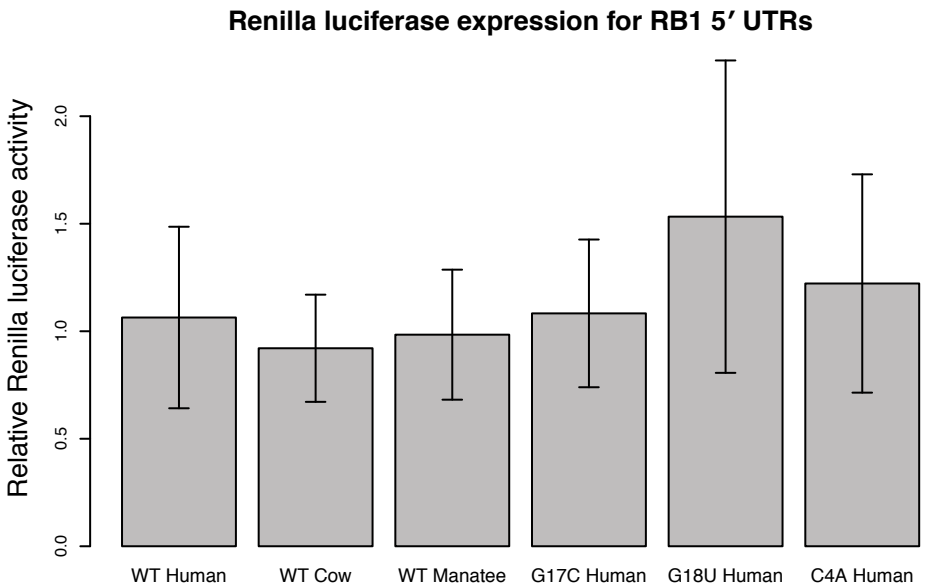

Supplement: supp_049221.114_FigureS5.pdf [file supp_049221.114_FigureS5.pdf]
